# Supplementary material for: Employing the dynamics of the electrochemical interface at aqueous zinc-ion battery cathode
Source: Research Square preprint supplement (doi:10.21203/rs.3.rs-111489/v1), 2021-01-04
Supplement: Supplementary file 1 [file 9f06db0e36c32042ced622e7.docx]

**Supplementary Information**

**Employing the dynamics of the electrochemical interface at aqueous zinc-ion battery cathode**

Nigel Becknell1, Pietro P. Lopes1, Toru Hatsukade1, Xiuquan Zhou1, Yuzi Liu2, Brandon Fisher2, Duck Young Chung1, Mercouri G. Kanatzidis1,3, Nenad M. Markovic1, Sanja Tepavcevic1,* & Vojislav R. Stamenkovic1,†,*

1Materials Science Division, Argonne National Laboratory, Lemont, IL 60439, USA.

2Center for Nanoscale Materials, Argonne National Laboratory, Lemont, IL 60439, USA.

3Department of Chemistry, Northwestern University, Evanston, IL 60208, USA.

†Current address: The Henry Samueli School of Engineering, University of California, Irvine, Irvine, CA 92697, USA.

*corresponding author

**Supplementary Figures and Tables:**

**
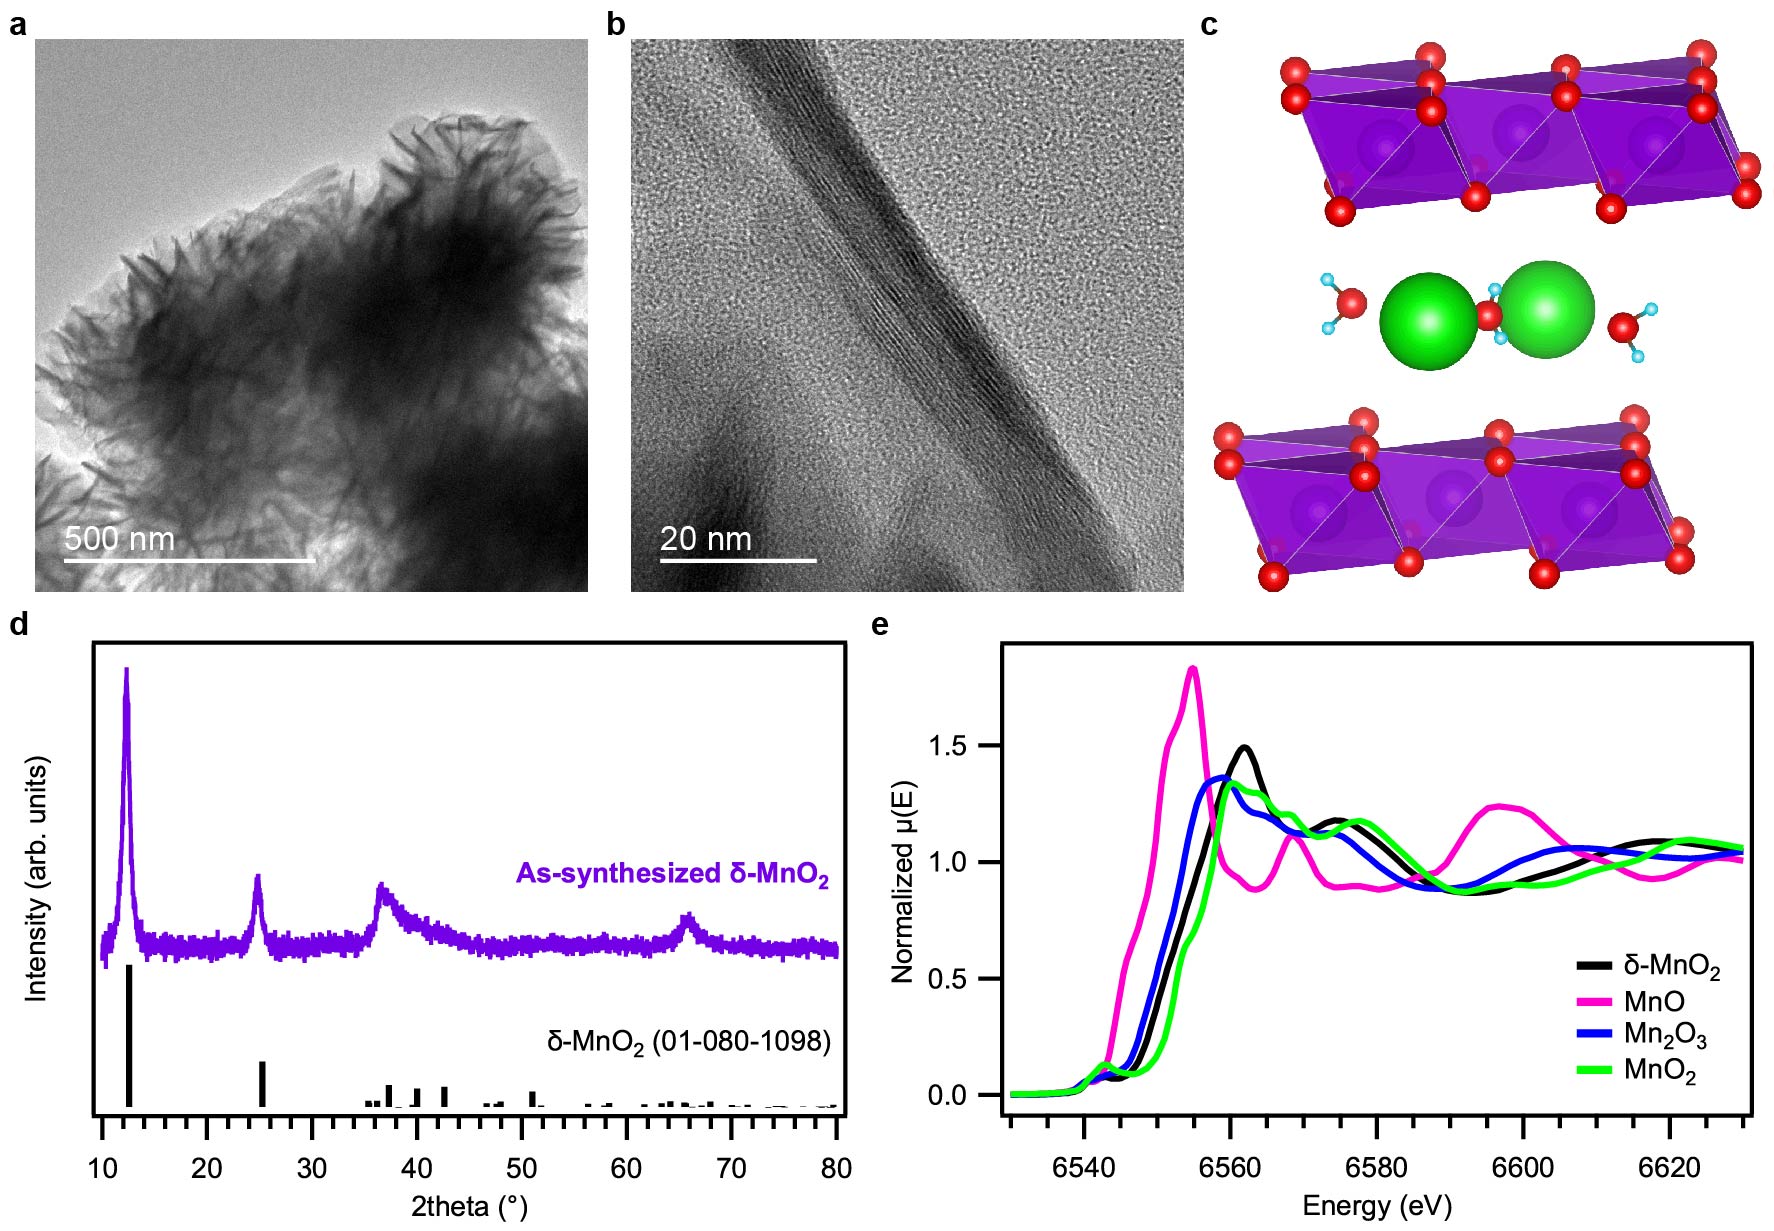
**

**Supplementary Figure 1. Characterization of as-synthesized δ-MnO2. a** TEM and **b** HRTEM images of δ-MnO2 sheets interconnected in clusters. **c** Schematic of δ-MnO2 structure. Mn-purple, O-red, H-blue, K-green. **d** XRD of δ-MnO2. **e** XANES of δ-MnO2 compared to standards.

**
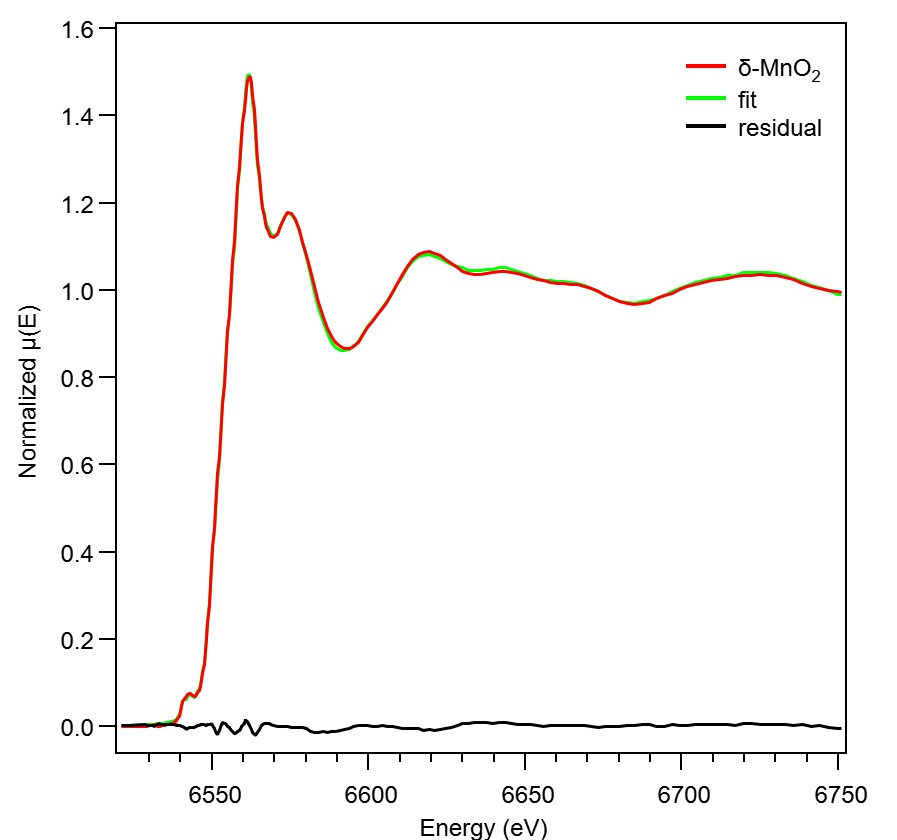
**

**Supplementary Figure 2. LCF to normalized XANES of as-prepared δ‑MnO2 using Combo method.** Fitting parameters are shown in Supplementary Table 1 for the fit between 6521 to 6751 eV. The fit indicates an average Mn oxidation state of 3.65.

**Supplementary Table 1. Fitting parameters for LCF to as-prepared δ-MnO2 using the Combo method.**

| **Mn Standards** | | **δ-MnO2** |
| --- | --- | --- |
| **Mn (IV)** | **Pyrolusite** | - |
| **Ramsdellite** | 0.185 |
| **Ca2Mn3O8** | 0.073 |
| **KBi** | 0.432 |
| **Mn (III)** | **Groutite** | - |
| **Feitknechtite** | 0.162 |
| **Manganite** | - |
| **Mn2O3** | - |
| **MnPO4** | 0.101 |
| **Mn (II)** | **Hureaulite** | - |
| **Fungi** | - |
| **Rhodocrosite** | 0.026 |
| **Manganosite** | - |
| **Pyroxmangite** | - |
| **Tephroite** | - |
| **MnSO4(aq)** | 0.022 |
| **MnSO4(s)** | - |
|  | **Sum** | 1.001 |
| **R-factor** | 0.00019 |
| **Reduced χ2** | 0.000043 |

**
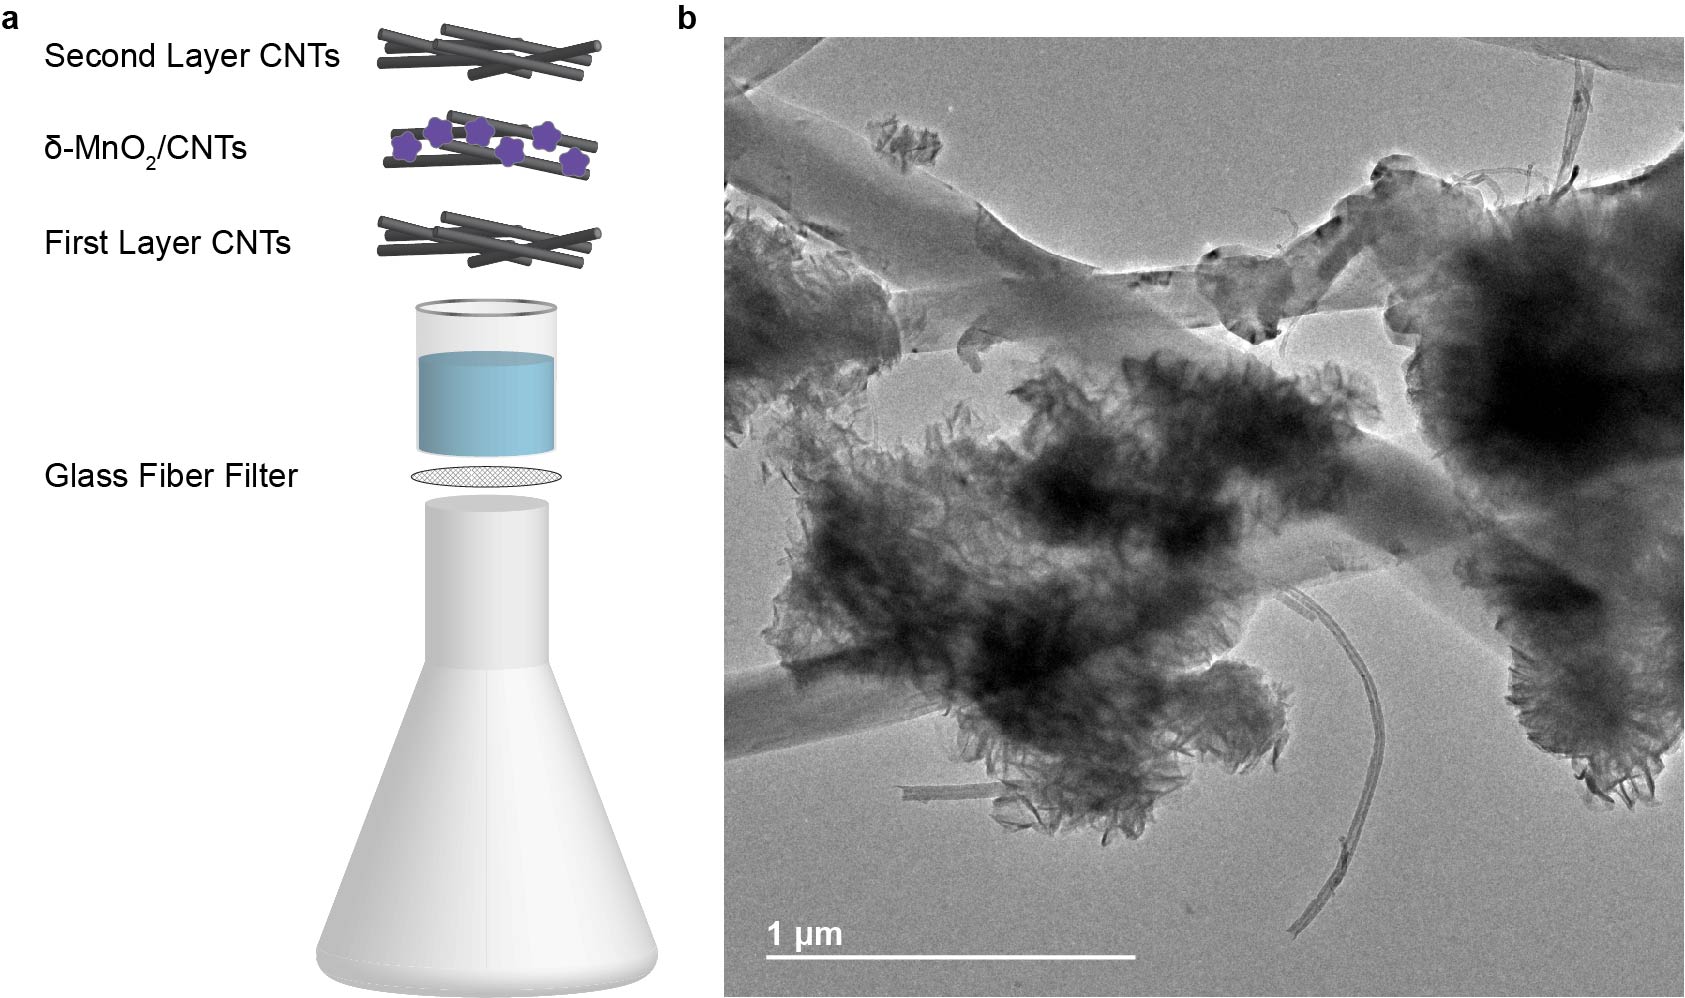
**

**Supplementary Figure 3. Electrode preparation for coin cell testing. a** Filtration of δ-MnO2 and CNTs onto a glass fiber filter created the δ-MnO2 /CNT composite electrode. **b** TEM image of δ-MnO2/CNT composite.**
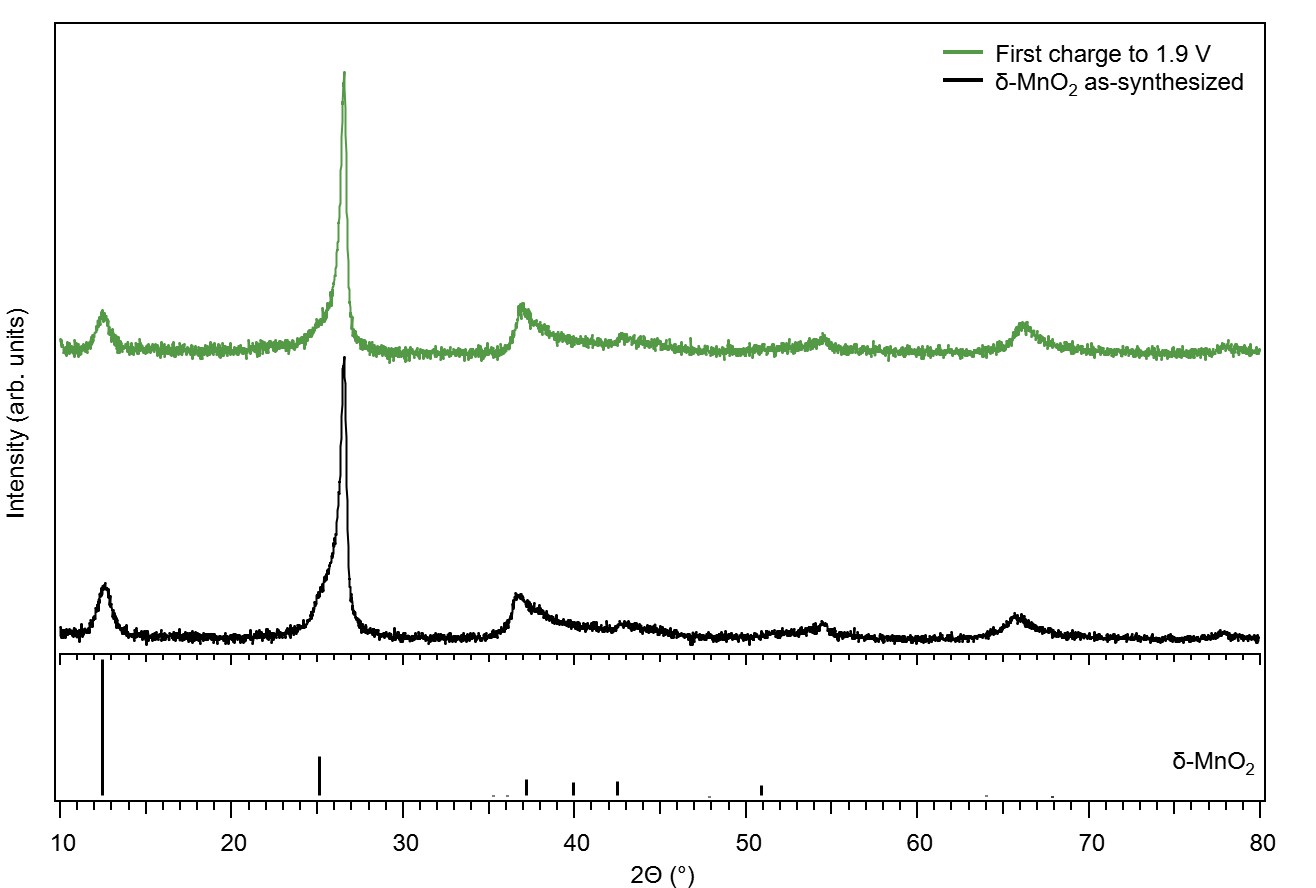
**

**Supplementary Figure 4. Similarity in structure after initial charging of δ-MnO2.** Comparison of XRD for as-synthesized δ-MnO2 and after the first charge to 1.9 V in 0.5 M ZnSO4/0.5 M MnSO4.


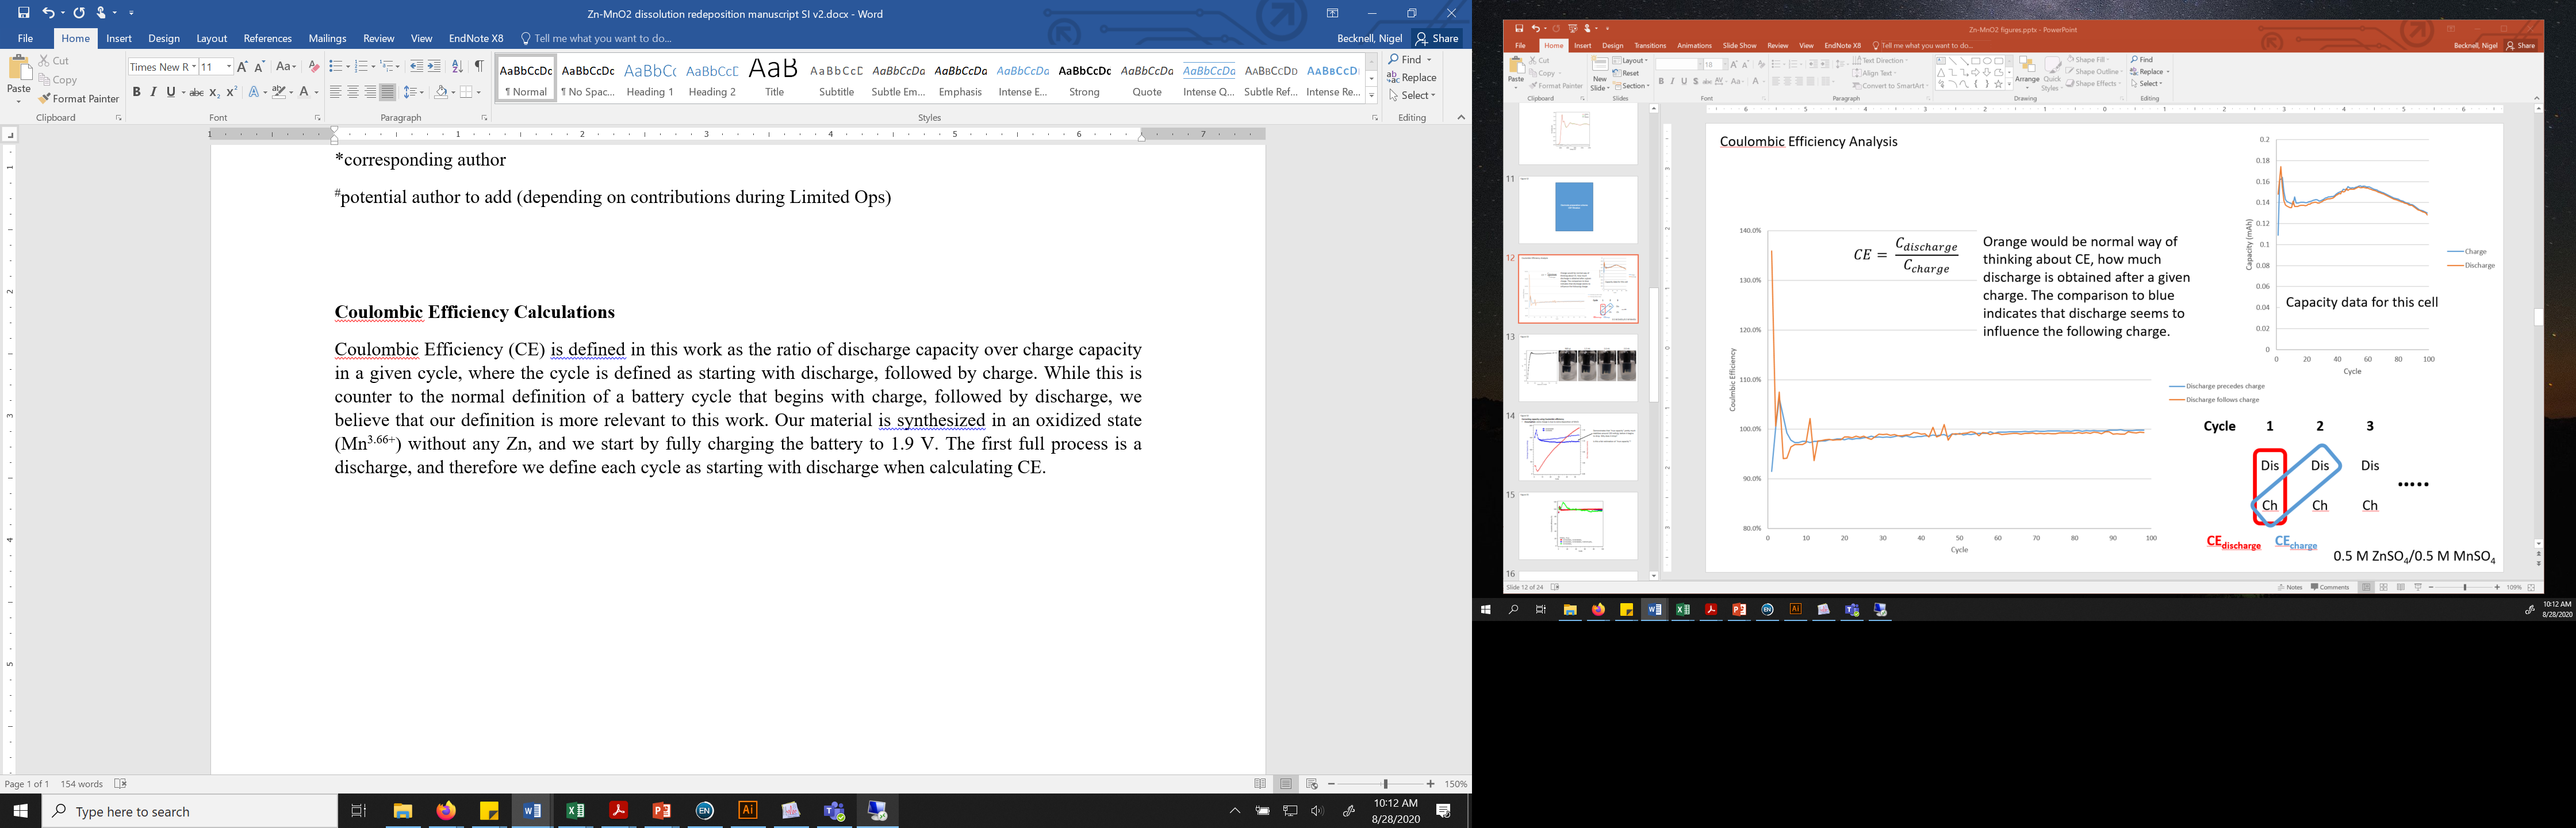


**Supplementary Figure 5. Explanation of how Coulombic efficiency is calculated in this work.** In this work, the cycle is defined as starting with discharge (circled in red), while the standard definition is typically a cycle starting with charge (circled in blue).

**
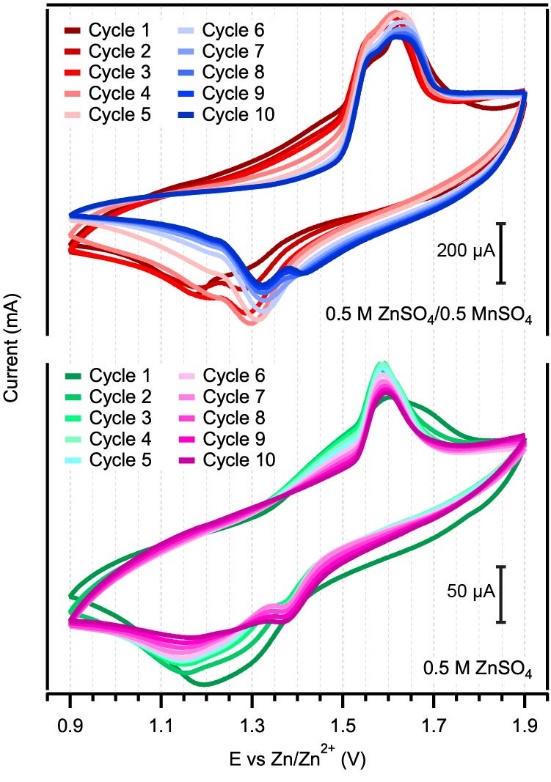
**

**Supplementary ­­Figure 6. Comparison of CV with and without Mn in electrolyte.** CV of δ-MnO2 in either Zn2+(aq)-Mn2+(aq) or Zn2+(aq)-only electrolyte at 0.5 mV/s between cycles 1 to 10.

**
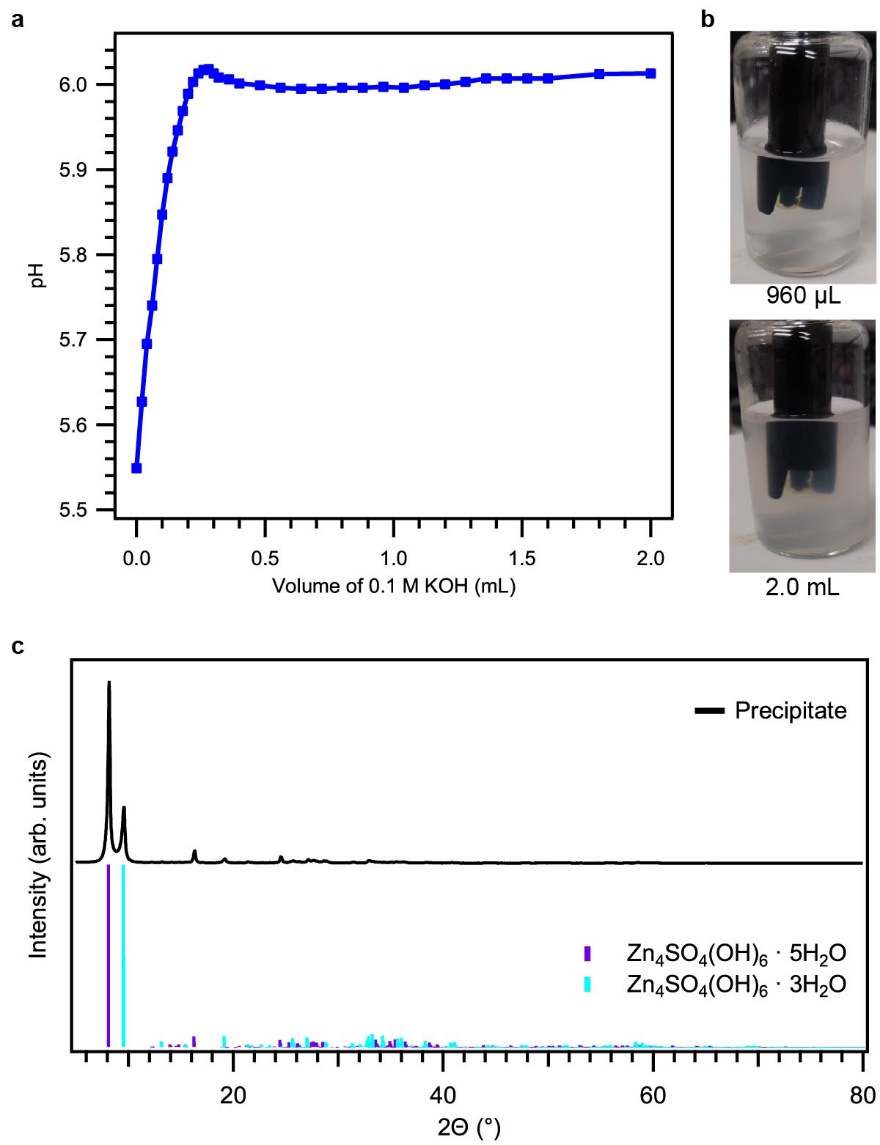
**

**Supplementary Figure 7. Raising pH of 0.5 M ZnSO4/0.5 M MnSO4 electrolyte by adding 0.1 M KOH. a** Change in pH with cumulative addition of 0.1 M KOH. **b** Images of solution becoming cloudy with addition of 960 µL (top) or 2.0 mL (bottom) 0.1 M KOH that precipitates white ZHS. **c** XRD pattern of precipitate after 2.0 mL of 0.1 M KOH addition to the electrolyte showing the presence of ZHS with their simulated diffraction peaks.

**
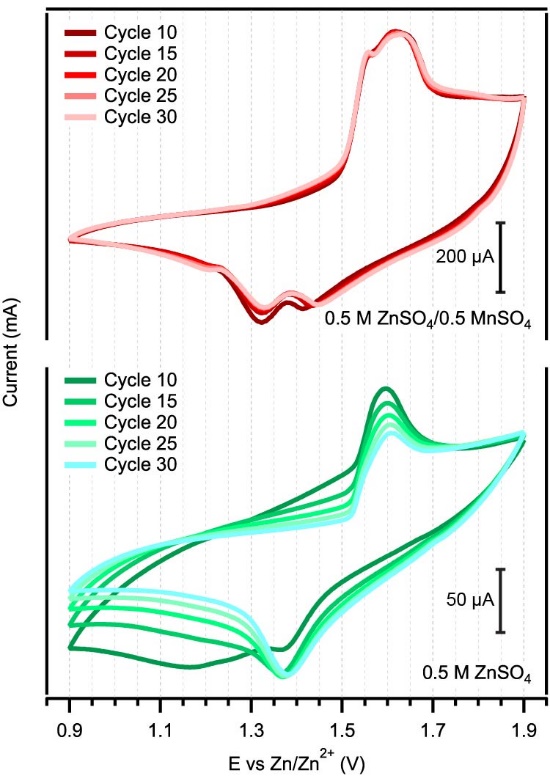
**

**Supplementary Figure 8. Comparison of CV with and without Mn in electrolyte.** CV of δ-MnO2 in either Zn2+(aq)-Mn2+(aq) or Zn2+(aq)-only electrolyte at 0.5 mV/s between cycles 10 to 30.

**Supplementary Table 2.** **Zn:Mn ratio in electrode (cycled in 0.5 M ZnSO4/0.5 M MnSO4) after rinsing with deionized water as determined by ICP-MS.**

|  | Zn:Mn ratio (ICP-MS) |
| --- | --- |
| 100 cycles, charge | 0.49 |
| 100 cycles, discharge | 0.61 |

**
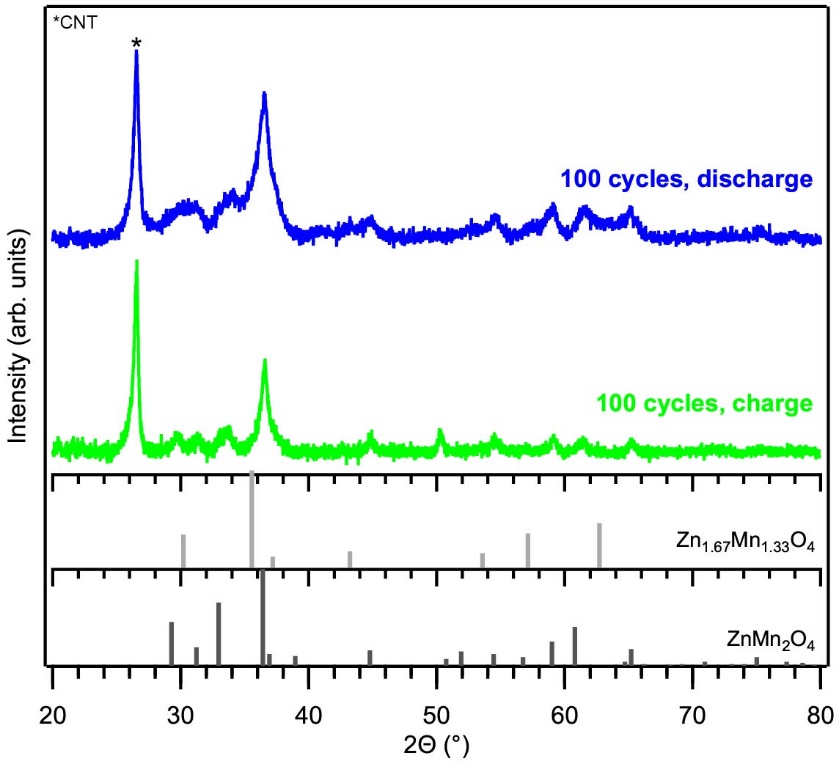
**

**Supplementary Figure 9. Determination of phase in charged and discharged state.** XRD of the δ-MnO2/CNT electrode after cycling 100 times in 0.5 M ZnSO4/0.5 M MnSO4 in the charged and discharged state.

**
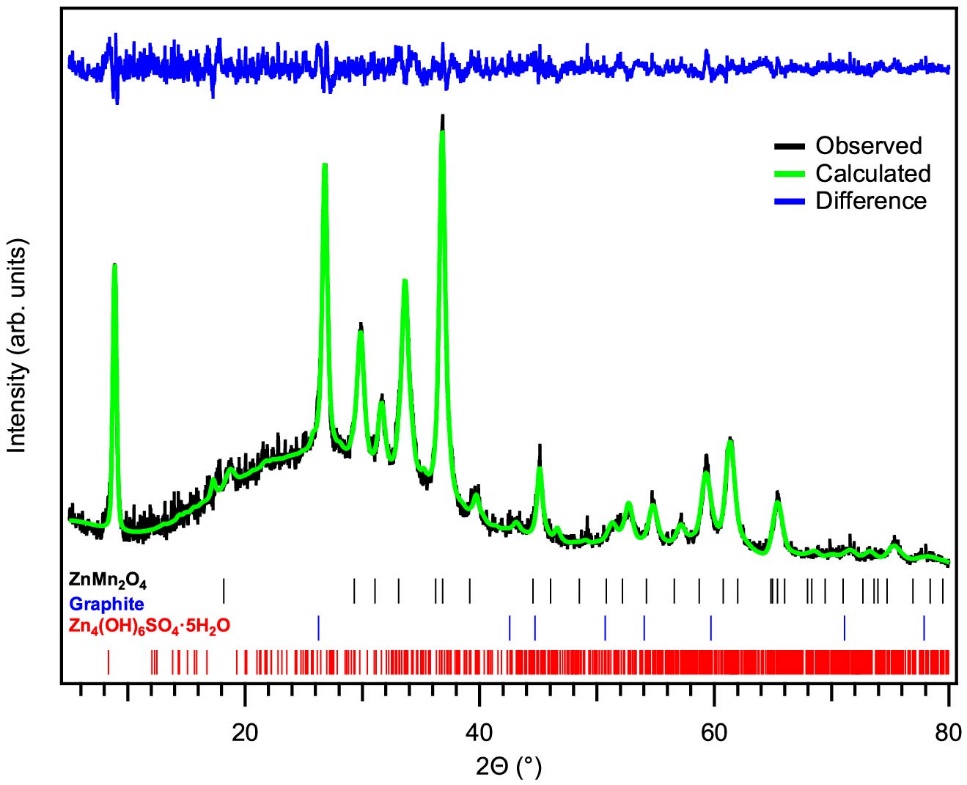
**

**Supplementary Figure 10. Long-term cycling of δ-MnO2 in Zn-only electrolyte.** Rietveld refinement of powder XRD pattern for electrode cycled 100 times in 0.5 M ZnSO4, ending on discharge. The refinement demonstrates an excellent fit to the data using tetragonal ZnMn2O4, graphite (for the CNT support), and ZHS·5H2O. The weight profile *Rwp* = 6.3%, and the ZnMn2O4 phase was fitted using a tetragonal space group of *I41/amd* with *a* = 5.7489(10) Å and *c* = 9.1961(18) Å**.**

**
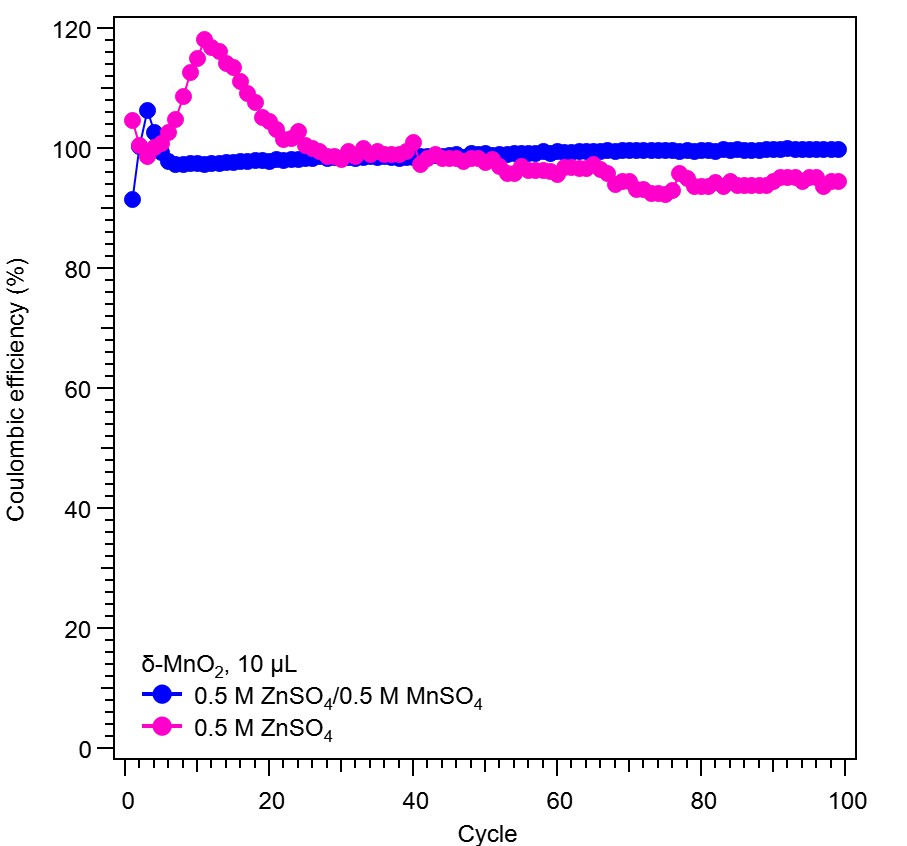
**

**Supplementary Figure 11. Comparison of CE with and without Mn in electrolyte.** CE of δ-MnO2/CNT electrode in Zn2+(aq)-Mn2+(aq) or Zn2+(aq)-only electrolyte over 100 cycles.

**
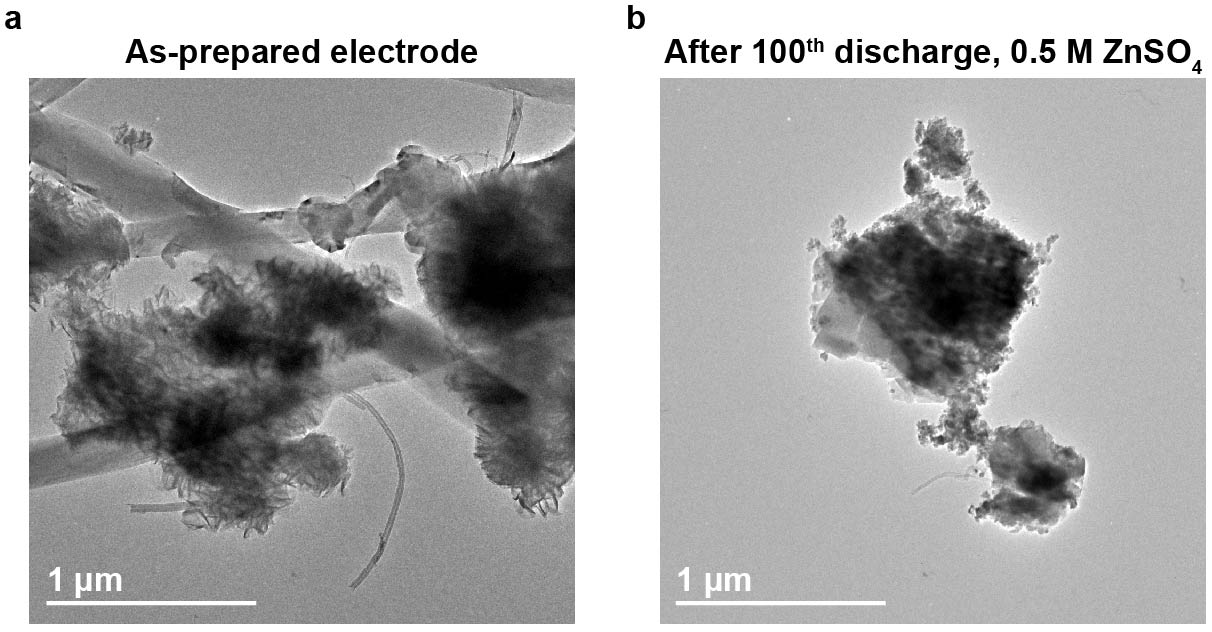
**

**Supplementary Figure 12. Structural degradation in Zn-only electrolyte.** TEM images of **a** the as-prepared δ-MnO2/CNT electrode and **b** the cycled electrode after the 100th discharge in 0.5 M ZnSO4.

**Supplementary Note 1. Explanation of Coulombic efficiency definition in this work.**

CE is defined in this work as the ratio of discharge capacity over charge capacity in a given cycle, where the cycle is defined as starting with discharge, followed by charge. In Supplementary Figure 5, this is labeled as CEdischarge in red, while the conventional definition of CE is labeled as CEcharge in blue. While this is counter to the normal definition of a battery cycle that begins with charge, followed by discharge, this definition is more relevant to the purpose of this work. The δ-MnO2 is synthesized in an oxidized state (Mn3.65+) without any Zn, and the coin cell is further conditioned by fully charging to 1.9 V. The first full process is a discharge, and therefore each cycle is defined as starting with discharge when calculating CE.
